# Supplementary material for: Quantifying the uncertainties in thermal–optical analysis of carbonaceous aircraft engine emissions: an interlaboratory study
Source: Copernicus journal article supplement (doi:10.5194/amt-17-4291-2024), 2024-07-19
Supplement: Supplementary file [file amt-17-4291-2024-supplement-title-page.pdf › amt-17-4291-2024-supplement-title-page.pdf]

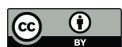

*Supplement of*

**Quantifying the uncertainties in thermal–optical analysis of carbonaceous aircraft engine emissions: an interlaboratory study**

**Timothy A. Sipkens et al.**

*Correspondence to:* Timothy A. Sipkens ([timothy.sipkens@nrc-cnrc.gc.ca](mailto:timothy.sipkens@nrc-cnrc.gc.ca))

- [amt-17-4291-2024-supplement-title-page.pdf](#)
- [2022 \(ilc-toa\) - Draft v8.4 -SI.pdf](#)
- [ec.csv](#)
- [oc.csv](#)
- [tc.csv](#)

The copyright of individual parts of the supplement might differ from the article licence.
